# Supplementary material
Source: PubMed Central journal article supplement (PMC4744803)
Supplement: NIHMS753821-supplement-Supplemental_file.pdf [file NIHMS753821-supplement-Supplemental_file.pdf]

# Supporting Information for “On Choosing the Optimal Rigid Receptor for Docking and Scoring in the CSAR 2013/2014 Experiment”

Matthew P. Baumgartner and Carlos J. Camacho\*

Department of Computational and Systems Biology, University of Pittsburgh, Pittsburgh, PA

\*ccamacho@pitt.edu.

## Table S1

List of features considered for training the SVM-Score ranking method for CSAR 2013 Phase 2. The bolded terms were used in the final model.

| Source                          | Term                                                                                                                                        |
|---------------------------------|---------------------------------------------------------------------------------------------------------------------------------------------|
|                                 | <b>Vina Score</b><br><b>Custom Score</b><br><b>Total SASA</b><br>Hydrophobic SASA                                                           |
| Unweighted Vina Scoring Terms   | gauss(o=0,_w=0.5,_c=8)<br>gauss(o=3,_w=2,_c=8)<br>repulsion(o=0,_c=8)<br>hydrophobic(g=0.5,_b=1.5,_c=8)<br>non_dir_h_bond(g=-0.7,_b=0,_c=8) |
| Unweighted Custom Scoring Terms | vdw(i=4,_j=8,_s=0,_^=100,_c=8)<br>non_dir_h_bond(g=-0.7,_b=0,_c=8)<br>ad4_solvation(d-sigma=3.6,_s/q=0.01097,_c=8)                          |

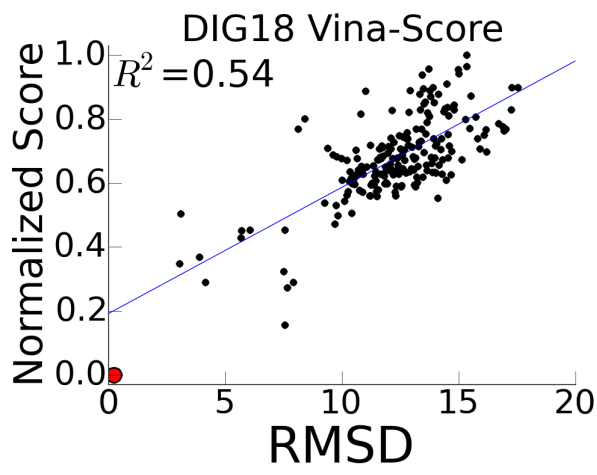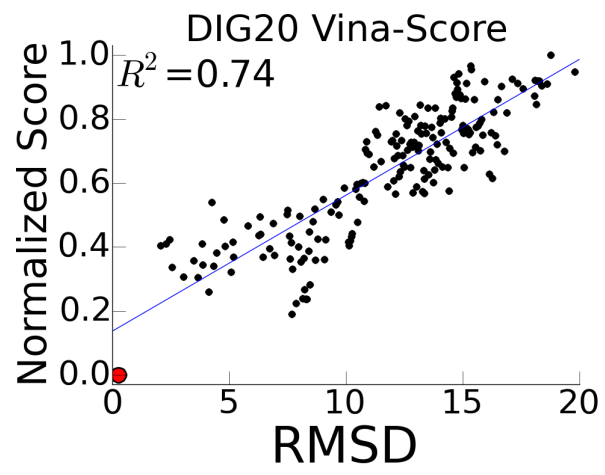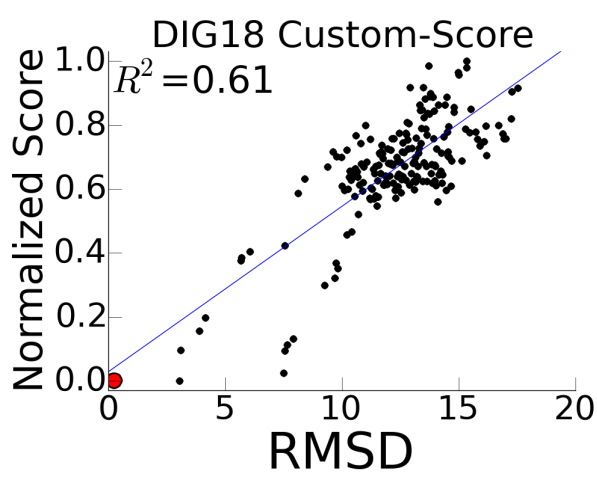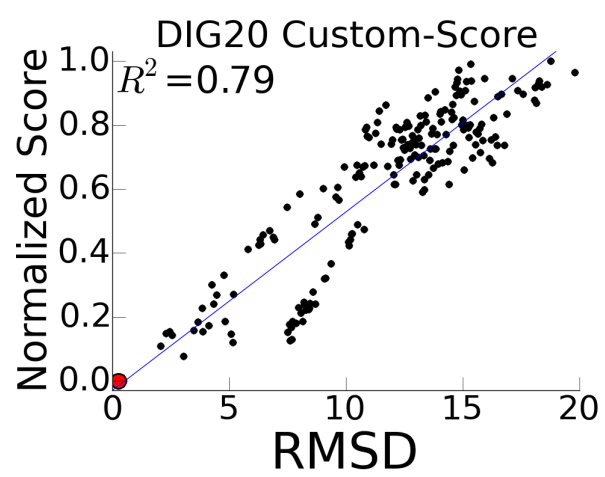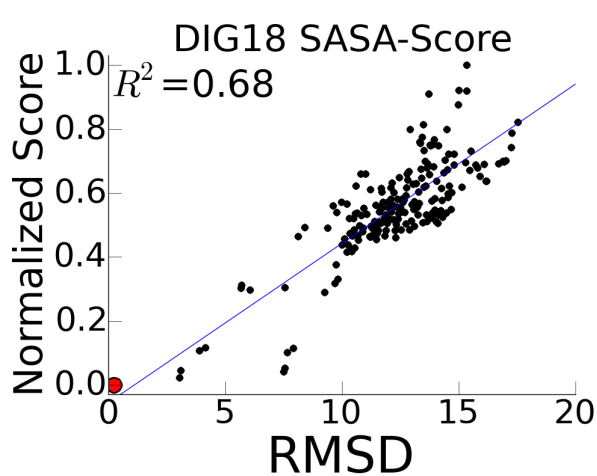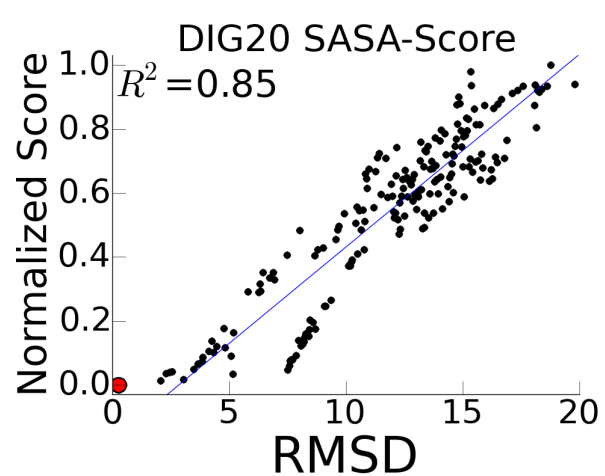

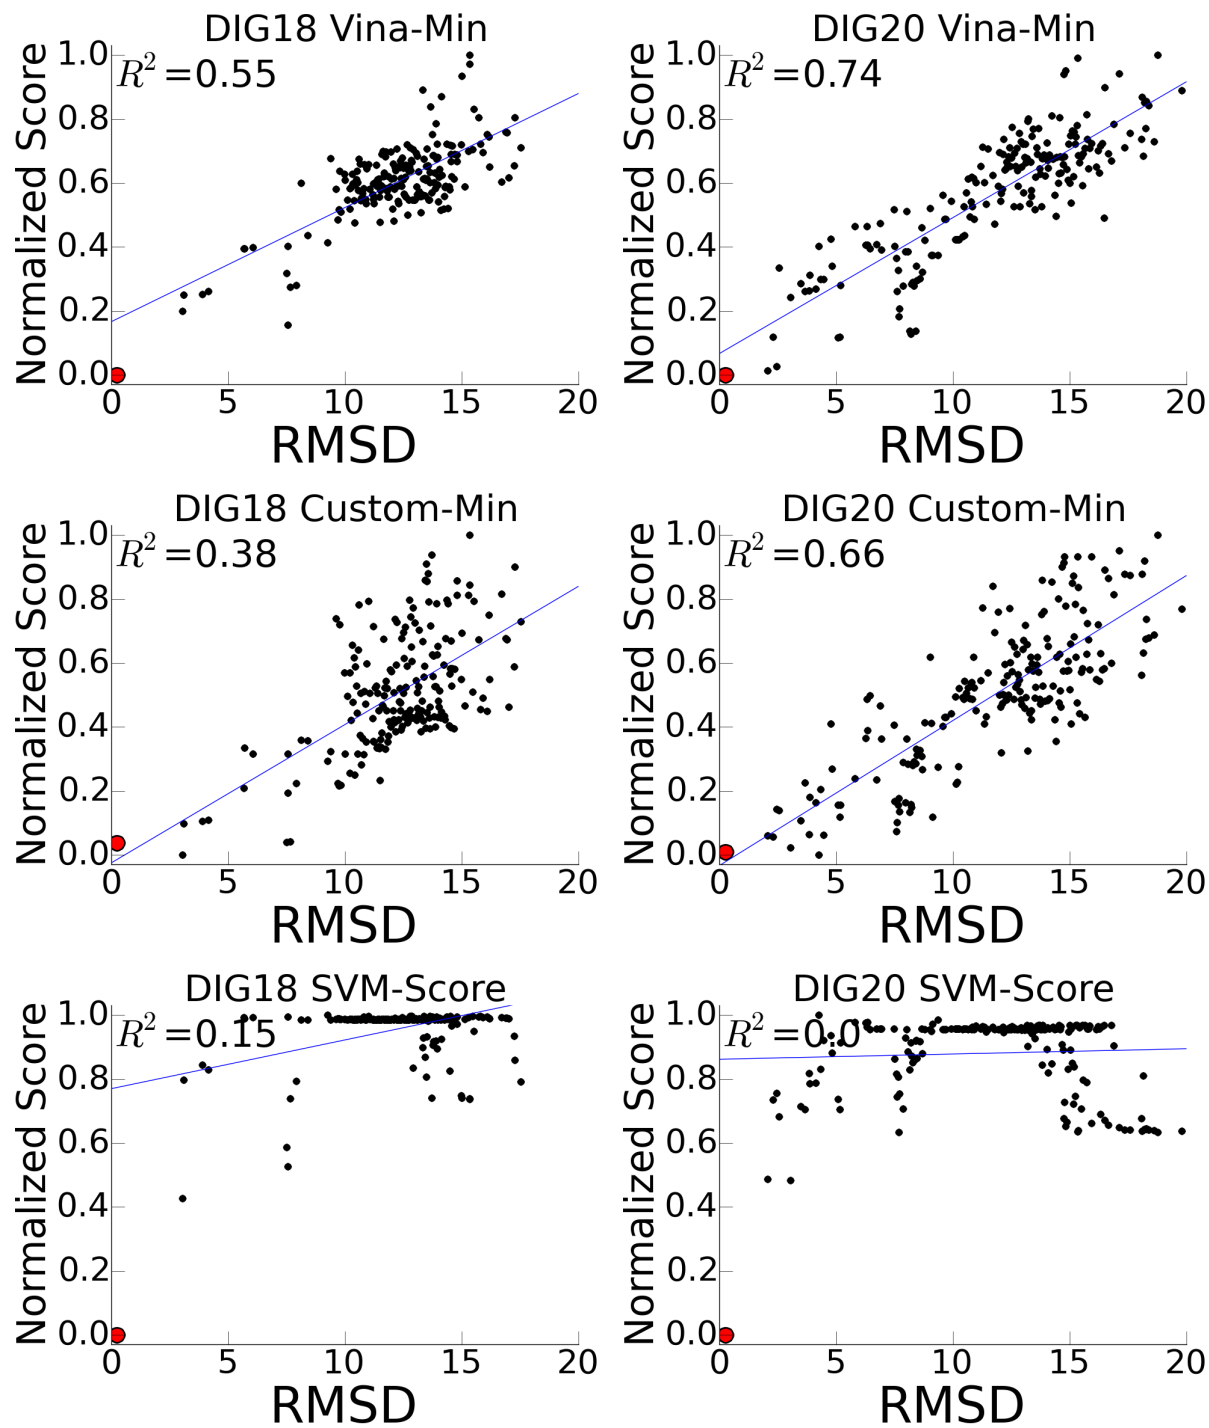

**Figure S1**

The RMSD of the decoy poses from CSAR 2013 Phase 2 plotted against their normalized scores using the six methods used. The red circle indicates the near-native pose and the blue line indicates the best-fit curve and the  $R^2$  is shown in each of the plots.

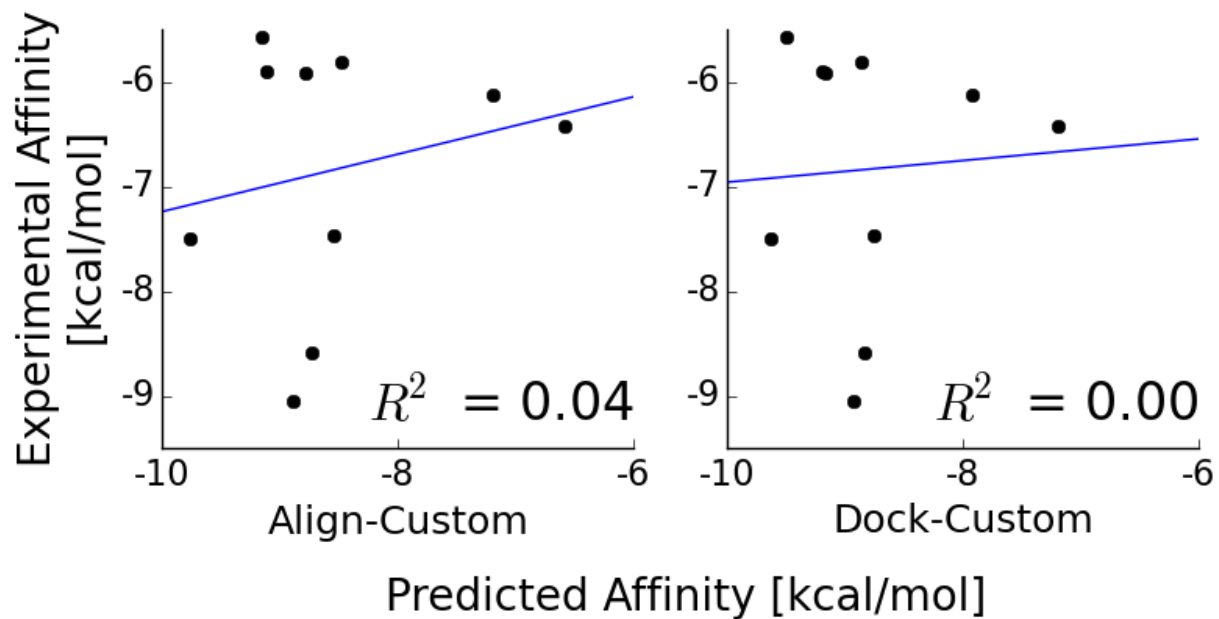

**Figure S2**

The Custom scoring function provides poor affinity predictions. (left) Pre-generated conformers are aligned to a co-crystallized ligand and energy minimized with the Custom scoring functions, or (right) compounds are docked with the Custom scoring function. The blue line shows the linear fit and the  $R^2$  value is shown in each subplot.
